# Supplementary material
Source: PubMed Central journal article supplement (PMC7616001)
Supplement: EMS196017-supplement-Supporting_Information.pdf [file EMS196017-supplement-Supporting_Information.pdf]

## ASSOCIATED CONTENT

### **S1** Supporting Information

The Supporting Information is available free of charge at <https://pubs.acs.org/doi/10.1021/acs.jmedchem.2c01174>.

Molecular formula strings ([CSV](#))

$^1\text{H}$  and  $^{13}\text{C}$  NMR spectra, mass spectra, and UPLC chromatograms of compounds; dose–response plots and  $\text{IC}_{50}$  values in 24 h MTT assays; reaction of **1** with NAC; cyclic voltammogram of **1**; dot plots of JC-1 assay and Annexin-V/PI assay and morphological analysis of ER; and crystallographic parameters, selected bond length, and bond angles for **6** ([PDF](#))
